# Supplementary material
Source: Research Square preprint supplement (doi:10.21203/rs.3.rs-8873663/v1)
Supplement: Supplementary file 1 [file 3b021e965d4d14e6d8c4b1cc.docx]

**
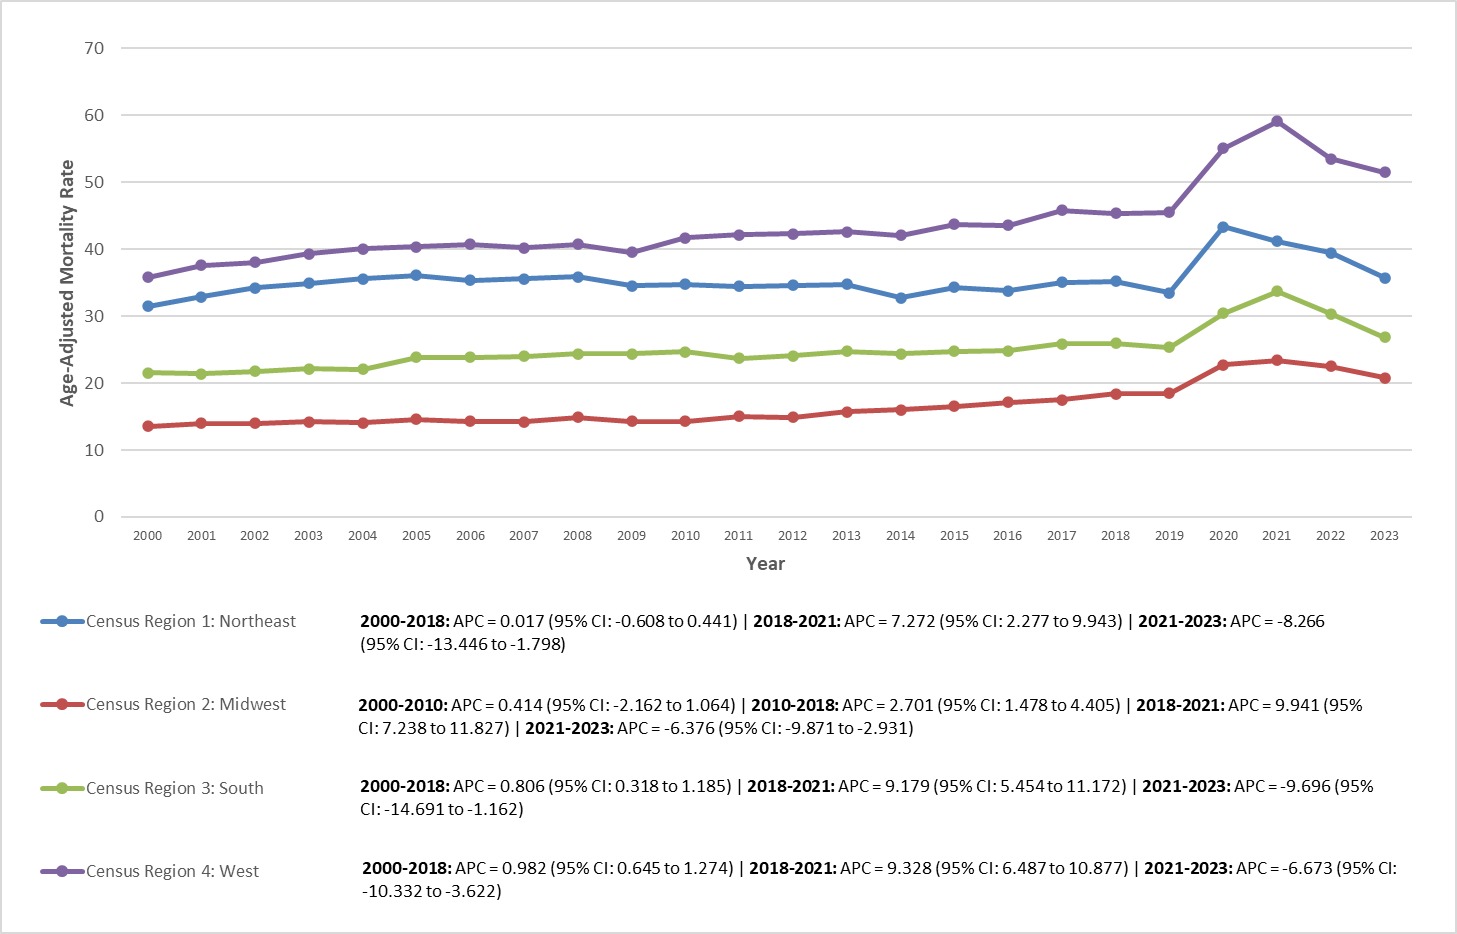
**

**Supplementary Figure 1.** Hypertension and cardiac arrest AAMRs per 100,000 in adults in the United States from 2000 to 2023, stratified by census region. APC, annual percent change; CI, confidence intervals.

**Supplementary Figure 2.** Trends in CA-related mortality in patients with HTN per 100,000 stratified by age group in the United States from 2000 to 2023

**Supplementary Figure 3.** Trends in CA-related mortality in patients with HTN per 100,000 stratified by urbanization in the United States from 2000 to 2029

| Year |  | Overall | Female | Male | Hispanic or Latino | NH White | NH American Indian | NH Asian | NH Black |
| --- | --- | --- | --- | --- | --- | --- | --- | --- | --- |
| 2000 |  | 43,800 | 25,710 | 18,090 | 2,876 | 30,656 | 132 | 1,573 | 8,412 |
| 2001 |  | 45,876 | 26,753 | 19,123 | 3,207 | 31,800 | 113 | 1,799 | 8,784 |
| 2002 |  | 47,552 | 27,511 | 20,041 | 3,390 | 32,767 | 141 | 1,788 | 9,275 |
| 2003 |  | 49,596 | 28,399 | 21,197 | 3,736 | 33,973 | 175 | 1,970 | 9,569 |
| 2004 |  | 50,804 | 29,149 | 21,655 | 3,940 | 34,420 | 200 | 2,107 | 9,983 |
| 2005 |  | 53,673 | 30,295 | 23,378 | 4,257 | 36,606 | 199 | 2,163 | 10,341 |
| 2006 |  | 54,641 | 30,568 | 24,073 | 4,486 | 37,102 | 213 | 2,261 | 10,500 |
| 2007 |  | 55,812 | 30,961 | 24,851 | 4,615 | 37,952 | 255 | 2,315 | 10,614 |
| 2008 |  | 58,076 | 32,052 | 26,024 | 4,813 | 39,644 | 238 | 2,477 | 10,812 |
| 2009 |  | 57,904 | 31,736 | 26,168 | 4,728 | 39,761 | 224 | 2,454 | 10,637 |
| 2010 |  | 60,175 | 32,595 | 27,580 | 5,219 | 41,144 | 281 | 2,654 | 10,676 |
| 2011 |  | 61,784 | 33,382 | 28,402 | 5,404 | 42,509 | 286 | 2,666 | 10,727 |
| 2012 |  | 63,799 | 34,060 | 29,739 | 5,823 | 43,635 | 315 | 2,813 | 10,991 |
| 2013 |  | 66,561 | 35,009 | 31,552 | 6,443 | 45,099 | 362 | 3,019 | 11,419 |
| 2014 |  | 66,753 | 34,688 | 32,065 | 6,555 | 45,038 | 390 | 3,067 | 11,460 |
| 2015 |  | 70,705 | 36,354 | 34,351 | 7,167 | 47,530 | 424 | 3,237 | 12,020 |
| 2016 |  | 72,300 | 36,934 | 35,366 | 7,466 | 48,249 | 453 | 3,495 | 12,341 |
| 2017 |  | 76,993 | 38,709 | 38,284 | 8,371 | 50,839 | 483 | 3,789 | 13,182 |
| 2018 |  | 79,130 | 39,554 | 39,576 | 8,488 | 52,073 | 471 | 4,065 | 13,703 |
| 2019 |  | 79,405 | 39,001 | 40,404 | 8,546 | 52,390 | 457 | 4,014 | 13,753 |
| 2020 |  | 99,136 | 48,099 | 51,037 | 12,442 | 62,049 | 591 | 5,162 | 17,832 |
| 2021 |  | 101,319 | 48,140 | 53,179 | 12,324 | 64,066 | 629 | 5,176 | 18,055 |
| 2022 |  | 97,734 | 47,305 | 50,429 | 10,969 | 63,629 | 551 | 5,004 | 16,535 |
| 2023 |  | 90,443 | 42,990 | 47,453 | 10,598 | 58,606 | 461 | 4,593 | 15,053 |
| Total |  | **1,603,971** | **840,154** | **763,817** | **155,863** | **1,071,537** | **8,044** | **73,661** | **286,674** |

**Supplementary Table 1**. Overall and sex stratified CA related mortality in patients with HTN in the United States from 2000 to 2023

| Deaths | | | | |
| --- | --- | --- | --- | --- |
| Year | **Medical Facility** | **Nursing Home/Long-term Care Facility** | **Home** | **Hospice Facility** |
| 2000 | 22455 | 9744 | 9301 | - |
| 2001 | 23149 | 10541 | 9772 | - |
| 2002 | 23856 | 10954 | 10298 | - |
| 2003 | 24650 | 11477 | 11062 | 45 |
| 2004 | 24625 | 11829 | 11583 | 99 |
| 2005 | 25698 | 12839 | 12288 | 251 |
| 2006 | 26082 | 12599 | 13191 | 283 |
| 2007 | 26457 | 12917 | 13645 | 349 |
| 2008 | 26643 | 12719 | 14212 | 483 |
| 2009 | 25093 | 12695 | 14556 | 616 |
| 2010 | 26722 | 13478 | 16378 | 754 |
| 2011 | 26632 | 14215 | 16928 | 821 |
| 2012 | 27008 | 14545 | 18275 | 892 |
| 2013 | 27241 | 14976 | 19664 | 1131 |
| 2014 | 27169 | 14691 | 20320 | 856 |
| 2015 | 28242 | 15453 | 22215 | 860 |
| 2016 | 29037 | 15169 | 23009 | 842 |
| 2017 | 30258 | 16362 | 24758 | 1039 |
| 2018 | 30413 | 16310 | 26502 | 1212 |
| 2019 | 30388 | 15341 | 27285 | 1398 |
| 2020 | 37384 | 18248 | 36213 | 1275 |
| 2021 | 41285 | 15108 | 37927 | 1355 |
| 2022 | 37371 | 15888 | 36649 | 1512 |
| 2023 | 34535 | 16593 | 33382 | 1388 |
| Total | **682,393** | **334,691** | **479,413** | **17,461** |

**Supplementary Table 2:** CA-related mortality in patients with HTN stratified by place of death in the United States from 2000 to 2023.

| Crude Rate (95% CI) | | | |
| --- | --- | --- | --- |
| Year | **25-44 years** | **45-64 years** | **65-85+ years** |
| 2000 | 0.77 [0.72 to 0.83] | 10.08 [9.83 to 10.33] | 105.44 [104.36 to 106.52] |
| 2001 | 0.91 [0.84 to 0.97] | 10.11 [9.86 to 10.35] | 109.35 [108.26 to 110.44] |
| 2002 | 0.91 [0.85 to 0.98] | 10.63 [10.38 to 10.87] | 111.75 [110.65 to 112.85] |
| 2003 | 1.02 [0.96 to 1.09] | 11.12 [10.87 to 11.37] | 114.56 [113.46 to 115.67] |
| 2004 | 1.00 [0.94 to 1.07] | 11.22 [10.97 to 11.46] | 116.05 [114.94 to 117.16] |
| 2005 | 1.14 [1.06 to 1.21] | 11.92 [11.67 to 12.17] | 120.09 [118.97 to 121.21] |
| 2006 | 1.15 [1.08 to 1.22] | 12.06 [11.82 to 12.31] | 120.06 [118.94 to 121.17] |
| 2007 | 1.09 [1.02 to 1.16] | 12.04 [11.80 to 12.29] | 120.63 [119.53 to 121.74] |
| 2008 | 1.17 [1.10 to 1.25] | 12.58 [12.34 to 12.83] | 121.76 [120.66 to 122.86] |
| 2009 | 1.13 [1.06 to 1.20] | 12.43 [12.19 to 12.67] | 118.61 [117.54 to 119.68] |
| 2010 | 1.10 [1.03 to 1.17] | 12.61 [12.37 to 12.86] | 121.67 [120.59 to 122.75] |
| 2011 | 1.14 [1.07 to 1.21] | 13.13 [12.88 to 13.38] | 120.73 [119.67 to 121.79] |
| 2012 | 1.13 [1.06 to 1.21] | 13.34 [13.09 to 13.59] | 120.07 [119.04 to 121.10] |
| 2013 | 1.18 [1.11 to 1.26] | 14.11 [13.86 to 14.37] | 120.46 [119.45 to 121.48] |
| 2014 | 1.28 [1.20 to 1.35] | 14.38 [14.13 to 14.64] | 116.05 [115.07 to 117.03] |
| 2015 | 1.34 [1.26 to 1.42] | 15.28 [15.02 to 15.55] | 118.76 [117.78 to 119.73] |
| 2016 | 1.36 [1.28 to 1.44] | 15.67 [15.40 to 15.93] | 117.67 [116.71 to 118.63] |
| 2017 | 1.36 [1.28 to 1.43] | 16.68 [16.40 to 16.96] | 121.42 [120.46 to 122.37] |
| 2018 | 1.37 [1.29 to 1.45] | 16.99 [16.71 to 17.27] | 121.46 [120.52 to 122.41] |
| 2019 | 1.40 [1.33 to 1.48] | 16.97 [16.69 to 17.25] | 118.45 [117.54 to 119.37] |
| 2020 | 1.9 [1.8 to 1.99] | 22.07 [21.75 to 22.39] | 142.29 [141.30 to 143.28] |
| 2021 | 2.24 [2.14 to 2.33] | 23.49 [23.16 to 23.82] | 142.74 [141.75 to 143.73] |
| 2022 | 1.9 [1.81 to 1.99] | 20.95 [20.64 to 21.27] | 136.25 [135.30 to 137.21] |
| 2023 | 1.69 [1.6 to 1.77] | 18.72 [18.43 to 19.02] | 124.07 [123.17 to 124.96] |
| Total | **1.23 [1.15 to 1.31]** | **14.23 [13.99 to 14.47]** | **121.30 [120.23 to 122.36]** |

**Supplementary Table 3 .** CA-related Crude Rate in patients with HTN per 100,000 stratified by Age Group in the United States from 2000 to 2023.

| Year | Overall | Female | Male |
| --- | --- | --- | --- |
| 2000 | 24.56 (24.33-24.79) | 23.21 (22.93-23.50) | 25.58 (25.20-25.96) |
| 2001 | 25.28 (25.05-25.51) | 23.86 (23.57-24.15) | 26.50 (26.12-26.88) |
| 2002 | 25.78 (25.55-26.02) | 24.23 (23.94-24.52) | 27.27 (26.88-27.65) |
| 2003 | 26.43 (26.20-26.67) | 24.66 (24.37-24.95) | 28.10 (27.72-28.49) |
| 2004 | 26.68 (26.45-26.91) | 25.01 (24.72-25.30) | 28.19 (27.81-28.57) |
| 2005 | 27.62 (27.38-27.85) | 25.58 (25.29-25.87) | 29.60 (29.21-29.98) |
| 2006 | 27.51 (27.27-27.74) | 25.32 (25.03-25.61) | 29.75 (29.37-30.13) |
| 2007 | 27.49 (27.26-27.72) | 25.13 (24.85-25.42) | 29.98 (29.60-30.36) |
| 2008 | 28.00 (27.77-28.23) | 25.61 (25.33-25.89) | 30.55 (30.17-30.93) |
| 2009 | 27.34 (27.12-27.57) | 24.87 (24.59-25.15) | 29.92 (29.55-30.29) |
| 2010 | 27.93 (27.70-28.15) | 25.17 (24.89-25.45) | 31.05 (30.68-31.42) |
| 2011 | 27.86 (27.64-28.08) | 25.12 (24.84-25.39) | 30.74 (30.38-31.11) |
| 2012 | 28.09 (27.87-28.31) | 25.19 (24.92-25.46) | 31.30 (30.94-31.67) |
| 2013 | 28.61 (28.39-28.83) | 25.33 (25.06-25.60) | 32.23 (31.87-32.60) |
| 2014 | 28.02 (27.81-28.24) | 24.70 (24.43-24.96) | 31.75 (31.39-32.10) |
| 2015 | 29.01 (28.80-29.23) | 25.39 (25.12-25.65) | 33.12 (32.76-33.48) |
| 2016 | 29.08 (28.87-29.30) | 25.36 (25.10-25.62) | 33.25 (32.90-33.60) |
| 2017 | 30.26 (30.05-30.48) | 26.05 (25.78-26.31) | 35.06 (34.70-35.42) |
| 2018 | 30.44 (30.23-30.65) | 26.18 (25.92-26.45) | 35.31 (34.95-35.66) |
| 2019 | 29.93 (29.72-30.14) | 25.37 (25.11-25.62) | 35.21 (34.86-35.56) |
| 2020 | 36.81 (36.57-37.04) | 30.98 (30.70-31.27) | 43.46 (43.07-43.84) |
| 2021 | 38.70 (38.45-38.94) | 32.49 (32.19-32.78) | 45.71 (45.31-46.11) |
| 2022 | 35.67 (35.44-35.89) | 30.09 (29.82-30.37) | 42.08 (41.71-42.46) |
| 2023 | 32.83 (32.62-33.05) | 27.56 (27.29-27.82) | 38.87 (38.51-39.23) |
| Total | 29.49 (29.45-29.53) | 25.86 (25.81-25.91) | 33.53 (33.47-33.59) |

**Age-Adjusted Rate (95% CI)**

**Supplementary Table 4.** Overall and sex-stratified CA-related AAMR in patients with HTN per 100,000 in the United States from 2000 to 2023.

|  | Age-Adjusted Rate (95% CI) | | | | |
| --- | --- | --- | --- | --- | --- |
| Year | **Hispanic** | **NH American Indian** | **NH Asian** | **NH Black** | **NH White** |
| 2000 | 33.77 [32.48 to 35.05] | 17.77 [14.60 to 20.94] | 40.35 [38.28 to 42.42] | 56.42 [55.20 to 57.64] | 20.33 [20.10 to 20.56] |
| 2001 | 35.95 [34.65 to 37.24] | 15.06 [12.12 to 18.00] | 42.48 [40.45 to 44.52] | 57.80 [56.57 to 59.02] | 20.82 [20.60 to 21.05] |
| 2002 | 35.76 [34.50 to 37.01] | 17.45 [14.41 to 20.49] | 40.04 [38.12 to 41.96] | 60.12 [58.88 to 61.36] | 21.22 [20.99 to 21.45] |
| 2003 | 37.63 [36.37 to 38.89] | 21.45 [18.06 to 24.85] | 41.84 [39.93 to 43.75] | 60.80 [59.56 to 62.04] | 21.69 [21.45 to 21.92] |
| 2004 | 37.76 [36.53 to 38.99] | 23.47 [19.98 to 26.96] | 42.76 [40.88 to 44.64] | 62.17 [60.92 to 63.41] | 21.72 [21.49 to 21.95] |
| 2005 | 38.26 [37.07 to 39.46] | 22.91 [19.52 to 26.30] | 40.43 [38.68 to 42.19] | 62.60 [61.37 to 63.83] | 22.72 [22.49 to 22.96] |
| 2006 | 38.43 [37.26 to 39.60] | 22.99 [19.68 to 26.30] | 40.11 [38.41 to 41.81] | 61.83 [60.62 to 63.04] | 22.62 [22.39 to 22.85] |
| 2007 | 37.71 [36.58 to 38.84] | 29.02 [25.24 to 32.80] | 38.45 [36.85 to 40.06] | 61.12 [59.93 to 62.31] | 22.75 [22.52 to 22.98] |
| 2008 | 37.06 [35.97 to 38.15] | 25.08 [21.68 to 28.49] | 39.36 [37.77 to 40.94] | 60.35 [59.19 to 61.52] | 23.41 [23.18 to 23.64] |
| 2009 | 34.64 [33.62 to 35.66] | 21.86 [18.80 to 24.93] | 36.55 [35.07 to 38.02] | 57.86 [56.73 to 58.99] | 23.10 [22.87 to 23.33] |
| 2010 | 36.81 [35.77 to 37.84] | 26.79 [23.44 to 30.14] | 37.71 [36.25 to 39.18] | 56.67 [55.57 to 57.77] | 23.58 [23.35 to 23.80] |
| 2011 | 35.19 [34.22 to 36.16] | 24.91 [21.83 to 28.00] | 34.85 [33.50 to 36.20] | 55.00 [53.93 to 56.07] | 23.85 [23.62 to 24.07] |
| 2012 | 35.77 [34.83 to 36.72] | 26.53 [23.42 to 29.64] | 34.16 [32.87 to 35.44] | 54.57 [53.52 to 55.62] | 24.06 [23.83 to 24.28] |
| 2013 | 37.26 [36.33 to 38.20] | 29.44 [26.24 to 32.63] | 34.14 [32.90 to 35.37] | 54.49 [53.46 to 55.52] | 24.43 [24.20 to 24.66] |
| 2014 | 35.61 [34.72 to 36.49] | 29.58 [26.49 to 32.67] | 32.05 [30.89 to 33.20] | 52.81 [51.81 to 53.80] | 24.03 [23.80 to 24.25] |
| 2015 | 36.30 [35.43 to 37.16] | 31.23 [28.12 to 34.34] | 31.61 [30.51 to 32.71] | 53.39 [52.41 to 54.38] | 25.01 [24.78 to 25.24] |
| 2016 | 36.06 [35.22 to 36.91] | 32.23 [29.14 to 35.32] | 32.31 [31.23 to 33.40] | 52.96 [52.00 to 53.92] | 25.05 [24.82 to 25.28] |
| 2017 | 38.24 [37.40 to 39.08] | 32.09 [29.11 to 35.07] | 32.73 [31.68 to 33.79] | 54.83 [53.87 to 55.80] | 26.01 [25.78 to 26.24] |
| 2018 | 37.18 [36.37 to 38.00] | 29.97 [27.17 to 32.77] | 33.41 [32.37 to 34.45] | 55.40 [54.45 to 56.35] | 26.17 [25.94 to 26.40] |
| 2019 | 35.92 [35.14 to 36.70] | 28.32 [25.64 to 30.99] | 31.22 [30.24 to 32.20] | 53.98 [53.06 to 54.91] | 25.94 [25.72 to 26.17] |
| 2020 | 49.46 [48.57 to 50.35] | 37.84 [34.70 to 40.99] | 40.32 [39.21 to 41.43] | 69.06 [68.02 to 70.10] | 30.73 [30.49 to 30.98] |
| 2021 | 48.18 [47.30 to 49.06] | 39.82 [36.60 to 43.03] | 40.37 [39.26 to 41.48] | 70.00 [68.94 to 71.05] | 33.12 [32.86 to 33.39] |
| 2022 | 41.52 [40.72 to 42.32] | 33.06 [30.24 to 35.89] | 36.02 [35.02 to 37.03] | 62.38 [61.41 to 63.36] | 31.34 [31.09 to 31.59] |
| 2023 | 38.76 [38.00 to 39.52] | 26.94 [24.43 to 29.44] | 32.16 [31.23 to 33.10] | 55.82 [54.90 to 56.73] | 28.96 [28.72 to 29.19] |
| Total | **37.31 [36.33 to 38.29]** | **26.48 [23.93 to 29.02]** | **36.62 [35.46 to 37.78]** | **58.77 [57.68 to 59.86]** | **24.52 [24.29 to 24.74]** |
|  |  |  |  |  |  |

**Supplementary Table 5**. CA-related AMMR in patients with HTN per 100,000 stratified by race in the United States from 2000 to 2023.

| Age-Adjusted Rate (95% CI) | | |
| --- | --- | --- |
| Year | **Metropolitan** | **Nonmetropolitan** |
| 2000 | 25.73 [25.47 to 25.99] | 19.61 [19.14 to 20.08] |
| 2001 | 26.54 [26.28 to 26.80] | 20.08 [19.60 to 20.55] |
| 2002 | 27.02 [26.76 to 27.29] | 20.73 [20.25 to 21.22] |
| 2003 | 27.56 [27.30 to 27.83] | 21.67 [21.18 to 22.16] |
| 2004 | 27.71 [27.45 to 27.97] | 22.38 [21.88 to 22.88] |
| 2005 | 28.46 [28.20 to 28.73] | 24.04 [23.53 to 24.55] |
| 2006 | 28.32 [28.06 to 28.58] | 23.99 [23.48 to 24.50] |
| 2007 | 28.33 [28.07 to 28.58] | 24.04 [23.53 to 24.54] |
| 2008 | 28.75 [28.49 to 29.00] | 24.82 [24.31 to 25.33] |
| 2009 | 27.93 [27.68 to 28.18] | 24.86 [24.35 to 25.36] |
| 2010 | 28.65 [28.40 to 28.91] | 24.89 [24.39 to 25.40] |
| 2011 | 28.53 [28.28 to 28.78] | 24.88 [24.38 to 25.38] |
| 2012 | 28.69 [28.44 to 28.93] | 25.61 [25.11 to 26.12] |
| 2013 | 29.20 [28.96 to 29.44] | 25.86 [25.35 to 26.36] |
| 2014 | 28.46 [28.22 to 28.69] | 26.30 [25.79 to 26.81] |
| 2015 | 29.43 [29.19 to 29.67] | 27.31 [26.79 to 27.83] |
| 2016 | 29.34 [29.11 to 29.58] | 28.09 [27.57 to 28.61] |
| 2017 | 30.47 [30.23 to 30.71] | 29.66 [29.12 to 30.19] |
| 2018 | 30.57 [30.34 to 30.81] | 30.25 [29.71 to 30.78] |
| 2019 | 30.01 [29.78 to 30.24] | 29.97 [29.44 to 30.50] |

**Supplementary Table 6.** CA-related AAMR in patients with HTN per 100,000 stratified by urban-rural classification in the United States from 2000 to 2020.

| State | Age-Adjusted Rate (95% CI) |
| --- | --- |
| Alabama | 28.76 [28.36 to 29.17] |
| Alaska | 9.28 [8.45 to 10.11] |
| Arizona | 20.92 [20.62 to 21.22] |
| Arkansas | 25.12 [24.64 to 25.60] |
| California | 65.83 [65.60 to 66.07] |
| Colorado | 12.26 [11.98 to 12.55] |
| Connecticut | 34.69 [34.21 to 35.17] |
| Delaware | 10.19 [9.64 to 10.74] |
| District of Columbia | 20.59 [19.57 to 21.60] |
| Florida | 21.34 [21.18 to 21.50] |
| Georgia | 46.07 [45.67 to 46.48] |
| Hawaii | 40.25 [39.39 to 41.10] |
| Idaho | 10.46 [10.02 to 10.91] |
| Illinois | 10.06 [9.91 to 10.20] |
| Indiana | 15.52 [15.26 to 15.77] |
| Iowa | 12.39 [12.08 to 12.70] |
| Kansas | 14.97 [14.60 to 15.34] |
| Kentucky | 15.30 [14.99 to 15.62] |
| Louisiana | 17.64 [17.30 to 17.98] |
| Maine | 9.53 [9.13 to 9.93] |
| Maryland | 8.07 [7.87 to 8.27] |
| Massachusetts | 19.92 [19.65 to 20.20] |
| Michigan | 12.04 [11.86 to 12.21] |
| Minnesota | 7.54 [7.34 to 7.73] |
| Mississippi | 91.34 [90.40 to 92.29] |
| Missouri | 14.01 [13.76 to 14.25] |
| Montana | 9.70 [9.21 to 10.19] |
| Nebraska | 30.88 [30.22 to 31.53] |
| Nevada | 32.24 [31.60 to 32.89] |
| New Hampshire | 15.55 [15.00 to 16.11] |
| New Jersey | 20.19 [19.94 to 20.43] |
| New Mexico | 14.56 [14.10 to 15.01] |
| New York | 62.00 [61.71 to 62.28] |
| North Carolina | 23.34 [23.08 to 23.61] |
| North Dakota | 18.36 [17.56 to 19.16] |
| Ohio | 30.10 [29.84 to 30.36] |
| Oklahoma | 25.42 [24.98 to 25.85] |
| Oregon | 8.98 [8.74 to 9.23] |
| Pennsylvania | 18.99 [18.81 to 19.18] |
| Rhode Island | 30.45 [29.63 to 31.27] |
| South Carolina | 26.45 [26.05 to 26.85] |
| South Dakota | 11.01 [10.43 to 11.58] |
| Tennessee | 22.66 [22.34 to 22.97] |
| Texas | 18.99 [18.82 to 19.15] |
| Utah | 11.04 [10.64 to 11.44] |
| Vermont | 12.61 [11.90 to 13.31] |
| Virginia | 15.37 [15.13 to 15.61] |
| Washington | 15.46 [15.20 to 15.72] |
| West Virginia | 31.47 [30.83 to 32.10] |
| Wisconsin | 7.97 [7.78 to 8.16] |
| Wyoming | 13.31 [12.47 to 14.15] |

**Supplementary Table 7:** CA-related AAMR in patients with HTN per 100,000, stratified by state in the United States from 2000 to 2023

|  | Census Region: Midwest | Census Region:  South | Census Region:  West | Census Region: North-East |
| --- | --- | --- | --- | --- |
| Year | **Age-Adjusted Rate (95% CI)** | **Age-Adjusted Rate (95% CI)** | **Age-Adjusted Rate (95% CI)** | **Age-Adjusted Rate (95% CI)** |
| 2000 | 13.56 [13.21 to 13.91] | 21.53 [21.17 to 21.90] | 35.80 [35.18 to 36.43] | 31.50 [30.94 to 32.07] |
| 2001 | 13.96 [13.61 to 14.32] | 21.41 [21.05 to 21.77] | 37.59 [36.96 to 38.22] | 32.91 [32.34 to 33.49] |
| 2002 | 13.96 [13.61 to 14.31] | 21.75 [21.39 to 22.11] | 38.02 [37.39 to 38.65] | 34.26 [33.68 to 34.84] |
| 2003 | 14.25 [13.89 to 14.60] | 22.15 [21.79 to 22.51] | 39.31 [38.67 to 39.94] | 34.93 [34.34 to 35.51] |
| 2004 | 14.10 [13.76 to 14.45] | 22.03 [21.67 to 22.38] | 40.05 [39.42 to 40.69] | 35.60 [35.02 to 36.19] |
| 2005 | 14.60 [14.25 to 14.96] | 23.85 [23.48 to 24.21] | 40.35 [39.72 to 40.97] | 36.08 [35.49 to 36.66] |
| 2006 | 14.29 [13.95 to 14.64] | 23.87 [23.51 to 24.23] | 40.74 [40.12 to 41.36] | 35.38 [34.80 to 35.96] |
| 2007 | 14.20 [13.86 to 14.54] | 24.04 [23.68 to 24.39] | 40.23 [39.62 to 40.84] | 35.62 [35.04 to 36.19] |
| 2008 | 14.92 [14.58 to 15.27] | 24.41 [24.06 to 24.77] | 40.77 [40.16 to 41.37] | 35.92 [35.34 to 36.49] |
| 2009 | 14.27 [13.93 to 14.61] | 24.37 [24.02 to 24.72] | 39.56 [38.97 to 40.15] | 34.52 [33.96 to 35.08] |
| 2010 | 14.27 [13.94 to 14.61] | 24.66 [24.31 to 25.01] | 41.69 [41.09 to 42.29] | 34.73 [34.17 to 35.29] |
| 2011 | 15.01 [14.67 to 15.35] | 23.70 [23.36 to 24.04] | 42.13 [41.54 to 42.72] | 34.45 [33.89 to 35.00] |
| 2012 | 14.92 [14.58 to 15.26] | 24.09 [23.75 to 24.43] | 42.34 [41.75 to 42.92] | 34.62 [34.07 to 35.17] |
| 2013 | 15.72 [15.37 to 16.06] | 24.76 [24.42 to 25.09] | 42.59 [42.01 to 43.17] | 34.73 [34.18 to 35.28] |
| 2014 | 15.99 [15.64 to 16.34] | 24.36 [24.02 to 24.69] | 42.11 [41.55 to 42.68] | 32.72 [32.19 to 33.25] |
| 2015 | 16.55 [16.20 to 16.90] | 24.73 [24.40 to 25.06] | 43.76 [43.20 to 44.33] | 34.34 [33.80 to 34.88] |
| 2016 | 17.12 [16.77 to 17.47] | 24.85 [24.52 to 25.18] | 43.62 [43.07 to 44.18] | 33.83 [33.30 to 34.36] |
| 2017 | 17.50 [17.15 to 17.85] | 25.86 [25.53 to 26.19] | 45.85 [45.29 to 46.42] | 35.06 [34.52 to 35.59] |
| 2018 | 18.39 [18.03 to 18.75] | 25.97 [25.64 to 26.29] | 45.41 [44.85 to 45.97] | 35.21 [34.68 to 35.74] |
| 2019 | 18.48 [18.13 to 18.84 | 25.34 [25.02 to 25.66] | 45.52 [44.97 to 46.07] | 33.52 [33.00 to 34.03] |
| 2020 | 22.75 [22.36 to 23.15] | 30.46 [30.12 to 30.81] | 55.11 [54.52 to 55.71] | 43.35 [42.77 to 43.93] |
| 2021 | 23.39 [22.99 to 23.80] | 33.72 [33.35 to 34.09] | 59.13 [58.50 to 59.77] | 41.18 [40.61 to 41.75] |
| 2022 | 22.49 [22.10 to 22.88] | 30.33 [29.99 to 30.67] | 53.51 [52.93 to 54.09] | 39.44 [38.90 to 39.99] |
| 2023 | 20.81 [20.43 to 21.19] | 26.85 [26.53 to 27.17] | 51.50 [50.93 to 52.07] | 35.75 [35.23 to 36.27] |
| Total | **15.98 [15.64 to 16.32]** | **24.60 [24.25 to 24.95]** | **43.27 [42.68 to 43.86]** | **35.81 [35.26 to 36.37]** |

**Supplementary Table 8 .** CA-related AAMR in patients with HTN per 100,000 stratified by census region in the United States from 2000 to 2023.

| **UCD - 15 Leading Causes of Death** | **Deaths (2000-2020)** | **Deaths (2021-2023)** | **Total Deaths (2000-2023)** |
| --- | --- | --- | --- |
| **Diseases of heart (I00-I09,I11,I13,I20-I51)** | 563156 | 109084 | 672240 |
| **Essential hypertension and hypertensive renal disease (I10,I12,I15)** | 192007 | 43970 | 235977 |
| **Diabetes mellitus (E10-E14)** | 128149 | 30661 | 158810 |

**Supplementary Table 9.** CA-related Deaths in patients with HTN per 100,000 stratified by top 3 underlying causes of death in the United States from 2000 to 2023

| Group | Interval of years | APC (95% CI) |
| --- | --- | --- |
| Overall | 2000-2018 | 0.8402 (0.6545 to 1.0262) |
| Overall | 2018-2021 | 9.2352 (4.1868 to 14.5282) |
| Overall | 2021-2023 | -7.9996 (-12.1122 to -3.6946) |
|  |  |  |
| Male | 2000-2018 | 1.4572 (1.2574 to 1.6574) |
| Male | 2018-2021 | 9.9314 (4.8502 to 15.2589) |
| Male | 2021-2023 | -8.0509 (-12.0528 to -3.8668) |
|  |  |  |
| Female | 2000-2018 | 0.2810 (0.0911 to 0.4712) |
| Female | 2018-2021 | 8.2092 (2.9587 to 13.7275) |
| Female | 2021-2023 | -7.7872 (-12.1295 to -3.2304) |
|  |  |  |
| American Indian or Alaskan Native | 2000-2021 | 3.3062 (2.7453 to 4.3613) |
| American Indian or Alaskan Native | 2021-2023 | -13.4884 (-21.2178 to -2.2579) |
|  |  |  |
| Asian or Pacific Islander | 2000-2018 | -1.7878 (-2.3388 to -1.3300) |
| Asian or Pacific Islander | 2018-2021 | 9.4281 (5.1134 to 12.1363) |
| Asian or Pacific Islander | 2021-2023 | -11.7481 (-16.7721 to -6.4903) |
|  |  |  |
| Black or African American | 2000-2004 | 2.3642 (-0.3368 to 9.0247) |
| Black or African American | 2004-2018 | -1.2529 (-3.5984 to -0.8893) |
| Black or African American | 2018-2021 | 11.1645 (7.2789 to 13.8841) |
| Black or African American | 2021-2023 | -11.9843 (-16.0410 to -8.0053) |
|  |  |  |
| White | 2000-2018 | 1.1690 (0.8537 to 1.4296) |
| White | 2018-2021 | 8.5662 (5.9359 to 9.9437) |
| White | 2021-2023 | -5.9652 (-9.6328 to -2.4820) |
|  |  |  |
| Hispanic or Latino | 2000-2018 | -0.0060 (-0.3539 to 0.3431) |
| Hispanic or Latino | 2018-2021 | 10.5058 (2.4901 to 19.1484) |
| Hispanic or Latino | 2021-2023 | -12.2848 (-18.4737 to -5.6261) |
|  |  |  |
| Metropolitan | 2000-2003 | 2.2737 (0.7408 to 4.9605) |
| Metropolitan | 2003-2019 | 0.5424 (-0.3371 to 0.6931) |
| Metropolitan | 2019-2021 | 16.0877 (8.2473 to 24.6226) |
| Metropolitan | 2021-2023 | -9.4059 (-15.2584 to -3.1296) |
|  |  |  |
| Non-Metropolitan | 2000-2005 | 4.1477 (3.2798 to 5.2905) |
| Non-Metropolitan | 2005-2014 | 1.1023 (0.4062 to 2.4841) |
| Non-Metropolitan | 2014-2017 | 4.3105 (0.7878 to 5.0989) |
| Non-Metropolitan | 2017-2019 | 0.8379 (-0.9422 to 3.0721) |
| Non-Metropolitan | 2019-2021 | 12.5538 (6.1273 to 19.5274) |
| Non-Metropolitan | 2021-2023 | -7.8432 (-13.1256 to -2.1865) |
|  |  |  |
| Northeast | 2000-2018 | 0.0171 (-0.6082 to 0.4409) |
| Northeast | 2018-2021 | 7.2722 (2.2769 to 9.9427) |
| Northeast | 2021-2023 | -8.2658 (-13.4462 to -1.7977) |
|  |  |  |
| Midwest | 2000-2010 | 0.4138 (-2.1618 to 1.0640) |
| Midwest | 2010-2018 | 2.7013 (1.4776 to 4.4045) |
| Midwest | 2018-2021 | 9.9411 (7.2381 to 11.8273) |
| Midwest | 2021-2023 | -6.3758 (-9.8713 to -2.9311) |
|  |  |  |
| South | 2000-2018 | 0.8056 (0.3184 to 1.1854) |
| South | 2018-2021 | 9.1792 (5.4535 to 11.1715) |
| South | 2021-2023 | -9.6960 (-14.5115 to -4.1616) |
|  |  |  |
| West | 2000-2018 | 0.9820 (0.6448 to 1.2739) |
| West | 2018-2021 | 9.3280 (6.4866 to 10.8772) |
| West | 2021-2023 | -6.6729 (-10.3317 to -3.2482) |
|  |  |  |
| 25-44 years | 2000-2018 | 2.8675 (2.1389 to 3.4474) |
| 25-44 years | 2018-2021 | 16.2291 (10.5357 to 19.4719) |
| 25-44 years | 2021-2023 | -12.9948 (-19.6431 to -6.5592) |
|  |  |  |
| 45-64 years | 2000-2018 | 2.1042 (1.6550 to 2.4899) |
| 45-64 years | 2018-2021 | 12.9892 (9.0275 to 15.2842) |
| 45-64 years | 2021-2023 | -11.4614 (-16.1336 to -7.1899) |
|  |  |  |
| 65-85+ years | 2000-2018 | 0.5600 (0.1956 to 0.8498) |
| 65-85+ years | 2018-2021 | 8.1640 (5.2297 to 9.7746) |
| 65-85+ years | 2021-2023 | -7.0083 (-10.9574 to -2.9839) |

**Supplementary Table 10.** Summary of APCs of CA-related AAMR in patients with HTN per 100,000 in the United States from 2000 to 2023. (Crude Rate was used in place of Age-Adjusted Mortality Rate)
